# Supplementary material for: Synthesis and biological evaluation of RGD peptides with the99mTc/188Re chelated iminodiacetate core: highly enhanced uptake and excretion kinetics of theranostics against tumor angiogenesis
Source: Royal Society of Chemistry journal article supplement (doi:10.1039/c2ra22460g), 2012-11-08
Supplement: c2ra22460g.pdf [file c2ra22460g.pdf]

## Supplementary Information for:

**Synthesis and biological evaluation of RGD peptides with the  $^{99m}\text{Tc}/^{188}\text{Re}$  chelated iminodiacetate core: Highly enhanced uptake and excretion kinetics of theranostics against tumor angiogenesis**

Byung Chul Lee,<sup>†</sup> Byung Seok Moon,<sup>†</sup> Ji Sun Kim,<sup>†</sup> Jae Ho Jung,<sup>†</sup> Hyun Soo Park,<sup>†</sup> John A. Katzenellenbogen,<sup>‡</sup> Sang Eun Kim<sup>†,§,\*</sup>

*<sup>a</sup>Department of Nuclear Medicine, Seoul National University Bundang Hospital, Seoul National University College of Medicine, Seoul 110-799, Korea; <sup>b</sup>Department of Chemistry, University of Illinois, Urbana, Illinois 61801, USA; <sup>c</sup>Department of Nano Science and Technology, Graduate School of Convergence Science and Technology, Seoul National University, Seoul 151-742, Korea*

### Synthesis of $^{99m}\text{Tc-IDA-D-[c(RADfK)]}_2$ and $^{185/187}\text{Re-IDA-D-[c(RADfK)]}_2$

The cyclic pentapeptides, i.e., cyclic-Arg(Pbf)-Gly-Asp(O<sup>t</sup>Bu)-D-Phe-Lys-NH<sub>2</sub> and cyclic-Arg(Pbf)-Ala-Asp(O<sup>t</sup>Bu)-D-Phe-Lys-NH<sub>2</sub> (for  $^{99m}\text{Tc-IDA-D-[c(RADfK)]}_2$ ) were prepared using solid support coupling protocol according to previously described methods.<sup>21,27</sup> The  $^{99m}\text{Tc-IDA-D-[c(RADfK)]}_2$  ( $t_R$  = 18.6 min by HPLC condition A),  $^{185/187}\text{Re-IDA-D-[c(RADfK)]}_2$  [ $t_R$  = 19.2 min by HPLC condition A, MS (ESI)  $m/z$  1448.7 (M+H)<sup>+</sup>] and IDA-D-[c(RADfK)]<sub>2</sub> [MS (ESI)  $m/z$  1448.7 (M+H)<sup>+</sup>] were prepared by according to same procedure of  $^{99m}\text{Tc-IDA-D-[c(RGDfK)]}_2$ ,  $^{185/187}\text{Re-IDA-D-[c(RGDfK)]}_2$  and IDA-D-[c(RGDfK)]<sub>2</sub>, respectively.

**Table 1. HPLC data of  $^{185/187}\text{Re}$  or  $^{99m}\text{Tc-IDA-RGD}$  Analogs (1-6)**

<sup>a</sup>HPLC condition A

- semi-Preparative column (Agilent, Eclipse XDB-C18 column, 5  $\mu$ , 9.4  $\times$  250 mm)
- UV detector (Thermo, SectraSystem UV3000 set at 214 nm) with a gamma-ray detector (Bioscan, Flow-Count fitted with a NaI(Tl) detector)
- Eluant: 0 min (20% CH<sub>3</sub>CN/H<sub>2</sub>O/0.1% TFA); 5 min (20% CH<sub>3</sub>CN/H<sub>2</sub>O/0.1% TFA); 40 min (60% CH<sub>3</sub>CN/H<sub>2</sub>O/0.1% TFA)
- Flow rate: 2 mL/min

<sup>b</sup>HPLC condition B

- Analytical column (YMC, YMC-triart-C18 column, 5  $\mu$ , 4.6  $\times$  250 mm)
- UV detector (Thermo, SectraSystem UV2000 set at 214 nm)
- Eluant: 0 min (20% CH<sub>3</sub>CN/H<sub>2</sub>O/0.1% TFA); 5 min (20% CH<sub>3</sub>CN/H<sub>2</sub>O/0.1% TFA); 20 min (80% CH<sub>3</sub>CN/H<sub>2</sub>O/0.1% TFA)
- Flow rate: 0.7 mL/min

| Compound | $t_R$ (min) <sup>a</sup> | $t_R$ (min) <sup>b</sup> | $k'$ |
|----------|--------------------------|--------------------------|------|
| <b>1</b> | 21.8                     | 15.1                     | 1.90 |
| <b>2</b> | 22.1                     | 15.5                     | 1.98 |
| <b>3</b> | 19.2                     | 14.8                     | 1.85 |
| <b>4</b> | 20.6                     | 15.1                     | 1.90 |
| <b>5</b> | 21.4                     | 15.4                     | 1.96 |
| <b>6</b> | 18.4                     | 14.7                     | 1.83 |

**Table 2. Extraction efficiency of the organ homogenates and the blood samples 30 min and 120 min postinjection.**

|        | Extraction Efficiency [%] <sup>a</sup> |         |
|--------|----------------------------------------|---------|
|        | 30 min                                 | 120 min |
| blood  | 47.8                                   | 55.9    |
| urine  | 97.1                                   | 93.2    |
| tumor  | 93.2                                   | 87.3    |
| liver  | 86.5                                   | 62.3    |
| kidney | 95.5                                   | 88.6    |

<sup>a</sup>Amount of activity of soluble fractions, which was eluted from the C-18 Sep-Pak cartridge using acetonitrile.
